# Supplementary material for: Biochemical and structural characterisation of the second oxidative crosslinking step during the biosynthesis of the glycopeptide antibiotic A47934
Source: publisher site journal article supplement (doi:10.3762/bjoc.12.284), 2016-12-27
Supplement: Additional file 1 [file 1860-5397-12-284-S1.pdf]

**Supporting Information**  
**for**  
**Biochemical and structural characterisation of the**  
**second oxidative crosslinking step during the**  
**biosynthesis of the glycopeptide antibiotic A47934**

Veronika Ulrich<sup>1</sup>, Clara Brieke<sup>1</sup> and Max J. Cryle<sup>\*1,2,3</sup>

Address: <sup>1</sup>Department of Biomolecular Mechanisms, Max Planck Institute for Medical Research, Jahnstrasse 29, 69120 Heidelberg, Germany <sup>2</sup>EMBL Australia, Monash University, Clayton, Victoria 3800 and <sup>3</sup>The Monash Biomedicine Discovery Institute, Department of Biochemistry and Molecular Biology and ARC Centre of Excellence in Advanced Molecular Imaging, Monash University, Clayton, Victoria 3800.

Email: Max Cryle - max.cryle@monash.edu

\*Corresponding author

**HPLC–MS analysis of StaF turnover activity of Tei7-L-Hpg7 (a) and**  
**Act7-rac-Hpg7 (b) bound to MBP-PCP-X<sub>tei</sub>**

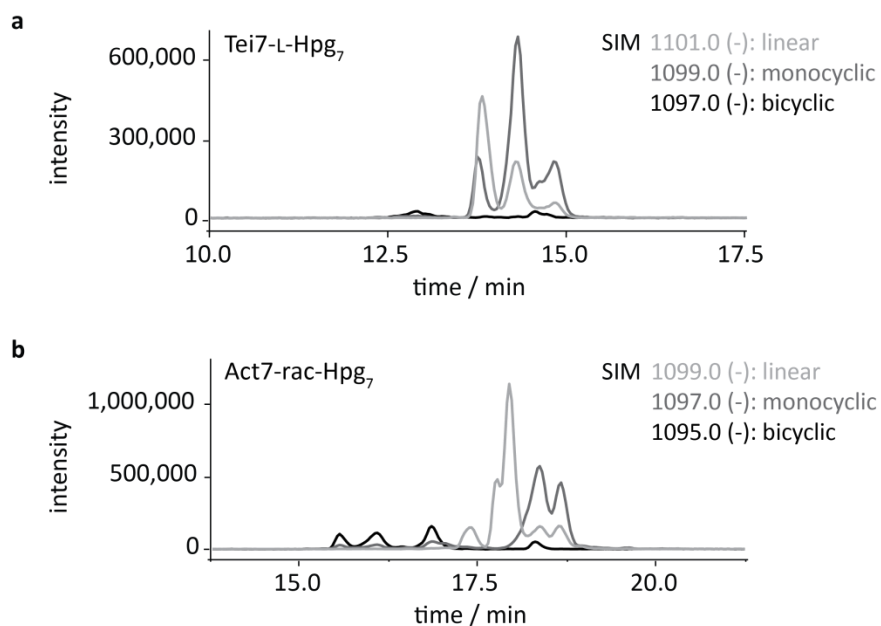

**Figure S1:** HPLC-MS analysis of StaF turnover activity of Tei7-L-Hpg<sub>7</sub> (a) and Act7-rac-Hpg<sub>7</sub> (b) bound to MBP-PCP-X<sub>tei</sub>. a) Ions corresponding to singly charged, linear (methylamine *m/z* 1101.0; depicted in light grey), monocyclic (methylamine *m/z* 1099.0; depicted in grey) and bicyclic Tei7-L-Hpg<sub>7</sub> (methylamine *m/z* 1097.0; depicted in black) were recorded using single-ion monitoring (SIM) in negative mode. The minor peak of the monocyclic peptide represents Tei7-D-Hpg<sub>7</sub>, which could not be separated completely from Tei7-L-Hpg<sub>7</sub> by preparative HPLC during peptide synthesis. b) Ions corresponding to singly charged, linear (methylamine *m/z* 1099.0; depicted in light grey), monocyclic (methylamine *m/z* 1097.0; depicted in grey) and bicyclic Act7-rac-Hpg<sub>7</sub> (methylamine *m/z* 1095.0; depicted in black) were recorded using single-ion monitoring (SIM) in negative mode. Major peaks for each *m/z* represent diastereomers due to racemisation of Hpg<sub>7</sub>. a) and b) Smaller peaks are caused through overlapping mass signal detection.
